# Supplementary material for: A new visible light and temperature responsive diblock copolymer
Source: Royal Society of Chemistry journal article supplement (doi:10.1039/c9py01050e), 2019-01-01
Supplement: c9py01050e1.pdf [file c9py01050e1.pdf]

## Supporting Information for

### A new visible light and temperature responsive diblock copolymer

Sijia Qian<sup>a</sup>, Shenzhen Li,<sup>a</sup> Weifeng Xiong,<sup>\*,b</sup> Habib Khan,<sup>a</sup> Jing Huang<sup>\*,c</sup> and Wangqing Zhang<sup>\*,a,d</sup>

<sup>a</sup> Key Laboratory of Functional Polymer Materials of the Ministry of Education, Institute of Polymer Chemistry, College of Chemistry, Nankai University, Tianjin 300071, China. E-mail: [wqzhang@nankai.edu.cn](mailto:wqzhang@nankai.edu.cn).

<sup>b</sup> State Key Laboratory of Special Functional Waterproof Materials, Beijing Oriental Yuhong Waterproof Technology Co., Ltd, Beijing 100123, China. E-mail: [xiongwf@yuhong.com.cn](mailto:xiongwf@yuhong.com.cn).

<sup>c</sup> Sinopec Research Institute of Petroleum Engineering, Beijing, China. E-mail: [eleven413@126.com](mailto:eleven413@126.com).

<sup>d</sup> Collaborative Innovation Center of Chemical Science and Engineering (Tianjin), Nankai University, Tianjin 300071, China.

\*To whom correspondence should be addressed. Tel: 86-22-23509794, Fax: 86-22-23503510.

#### 1. Synthesis of the mAzo monomer

The synthetic route of the monomer, 6-(2,6,2'-tetramethoxy-4'-oxyazobenzene) hexyl methacrylate (mAzo) is shown in Scheme S1.

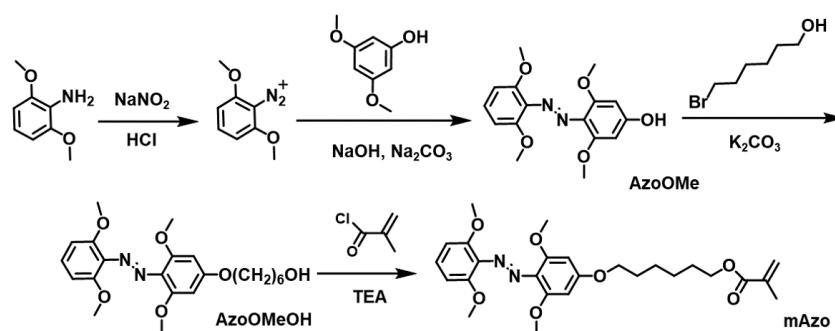

**Scheme S1.** Synthetic route of mAzo monomer.

#### *Synthesis of 4-(2,6-Dimethoxyphenyl) diazenyl)-3,5-dimethoxyphenol (AzoOMe).*

2,6-Dimethoxyaniline (11.12 g, 0.073 mol) was dissolved in hydrochloric acid (30mL, 10%). The resulting solution was stirred for half an hour at room temperature and then cooled to 0 °C. Sodium nitrite (5.016 g, 0.073 mol), dissolved in cooled deionized water (70 mL), was slowly added to the former solution. After a clear solution of the diazonium salt was stirred for half an hour, 3,5-dimethoxyphenol (11.96 g, 0.073 mol) together with

sodium hydroxide (5.56 g, 0.1391 mol) dissolved in 300 mL water was slowly added to the resulting mixture at 0 °C. The pH of the mixture solution was maintained at 9 by adding sodium carbonate (10 g, 80 mL H<sub>2</sub>O) and vigorously stirred at 0 °C for 1 h and then at room temperature for 3 days. The solution was acidified to pH 6 and stirred for an additional 30 min. Then the precipitated product was cooled with ice filtered, washed with ice cold water (100 mL) and purified by column chromatography (silica gel, ethyl acetate/ mineral ether (7/1), R<sub>f</sub>=0.2) to receive the product as a red powder. Yield: 87%. <sup>1</sup>H NMR (400 MHz, DMSO, δ): 7.32 (t, J=8.4 Hz, 1H, Ar-H), 6.84 (d, J=8.8 Hz, 2H, Ar-H), 6.12 (d, J=2.4, 1H, Ar-H), 6.02 (s, J=2.4, 1H, Ar-H), 3.86 (s, 3H, O-CH<sub>3</sub>), 3.83 (s, 3H, O-CH<sub>3</sub>), 3.81 (s, 6H, O-CH<sub>3</sub>). See <sup>1</sup>H NMR spectra in Figure S1.

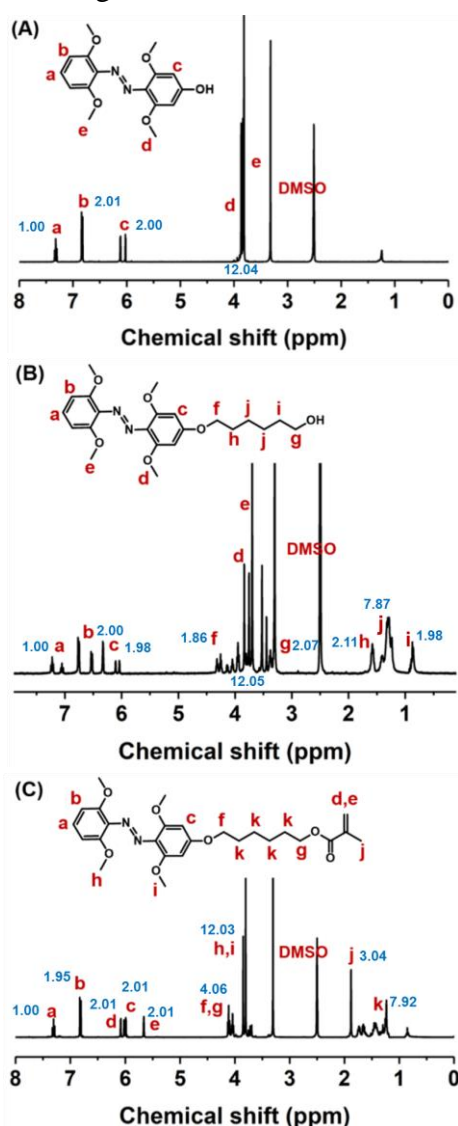

**Figure S1.** <sup>1</sup>H NMR spectra (400 MHz, DMSO-d<sub>6</sub>) of the mAzo monomer and its precursors.

***Synthesis of 2,6,2',6'-Tetramethoxy-(4-(6-hydroxyhexyloxy)) azobenzene (AzoOMeOH).***

AzoOMe (4.44 g, 14.15 mmol), anhydrous potassium carbonate (1.95 g, 14.15 mmol) and sodium iodide (0.212g, 4.245 mmol) were dissolved in dry DMF (70 mL). The resulting mixture was stirred for half an hour at 110 °C under an argon atmosphere. Diluent 6-bromo-1-hexanol (3.84 g, 21.23 mmol) was added dropwise and then stirred for 24h. The completion of the reaction was checked by thin layer chromatography using ethyl acetate as eluant. The red product was extracted with ethyl acetate and evaporated under reduced pressure and further purified using column chromatography (silica gel, ethyl acetate/mineral ether (5/1),  $R_f=0.2$ ). Yield: 48%.  $^1\text{H}$  NMR (400 MHz, DMSO, d): 7.05-7.23 (d,  $J=7.6\text{Hz}$ , 1H, Ar-H), 6.54-6.77 (t,  $J=8.4\text{Hz}$ , 2H, Ar-H), 6.11-6.32 (t,  $J=8.4\text{Hz}$ , 2H, Ar-H), 3.96- 4.32 (t,  $J=6.0\text{Hz}$ , 2H, Ar-O-CH<sub>2</sub>), 3.84 (s, 3H, O-CH<sub>3</sub>), 3.76 (s, 3H, O-CH<sub>3</sub>), 3.70 (s, 6H, O-CH<sub>3</sub>), 3.36-3.39 (t,  $J=5.6\text{Hz}$ , 2H, HO-CH<sub>2</sub>), 0.88-1.58 (m, 8H, C-CH<sub>2</sub>-C). See  $^1\text{H}$  NMR spectra in Figure S1.

***Synthesis of 6-(4-((2,6-Dimethoxyphenyl) diazenyl)- 3,5-dimethoxyphenoxy) hexyl methacrylate (mAzo).***

AzoOMeOH (2.37 g, 5.68 mmol) and TEA (1.725 g, 17.04 mmol) were dissolved in CH<sub>2</sub>Cl<sub>2</sub> (70 mL) and cooled to 0 °C under an argon atmosphere. Methacryloyl chloride (1.782 g, 17.04 mmol) was subsequently added dropwise under stirring. After 12 h, 5 mL ethanol was added and the solvent was removed under reduced pressure. The product was finally purified by column chromatography (silica gel, ethyl acetate / mineral ether (5/1),  $R_f = 0.2$ ) Yield: 93%.  $^1\text{H}$  NMR (400 MHz, DMSO,  $\delta$ ): 7.31 (t,  $J=8.4\text{Hz}$ , 1H, Ar-H), 6.83 (d,  $J=8.4\text{Hz}$ , 2H, Ar-H), 6.08 (d,  $J=2.4\text{Hz}$ , 2H, Ar-H), 6.02 (s, 1H, C=CH<sub>2</sub>), 5.66 (m, 1H, C=CH<sub>2</sub>), 4.17 (t,  $J=6.8\text{Hz}$ , 2H, Ar-O-CH<sub>2</sub>), 4.02 (t,  $J=6.4\text{Hz}$ , 2H, O-CH<sub>2</sub>), 3.88 (s, 6H, O-CH<sub>3</sub>), 3.84 (s, 6H, O-CH<sub>3</sub>), 1.88 (m, 3H, CH<sub>3</sub>), 1.23-1.74 (m, 8H, -CH<sub>2</sub>-CH<sub>2</sub>-CH<sub>2</sub>-CH<sub>2</sub>-). See  $^1\text{H}$  NMR spectra in Figure S1.

**2. Equation**

$$M_{n,\text{th}} = \frac{[\text{monomer}]_0 \times M_{\text{monomer}}}{[\text{RAFT}]_0} \times \text{conversion} + M_{\text{RAFT}} \quad (\text{S1})$$

### 3. Polymerizations

**Table S1.** Conditions for the RAFT polymerization of mAzo.

| NO. | [mAzo] <sub>0</sub> :[DDMAT] <sub>0</sub> :[I] <sub>0</sub> | Time (h) | Conv. <sup>a</sup> (%) |
|-----|-------------------------------------------------------------|----------|------------------------|
| 1   | 80:1:1                                                      | 15       | 28.8                   |
| 2   | 80:1:1                                                      | 24       | 42.3                   |
| 3   | 80:1:1                                                      | 39       | 48.8                   |
| 4   | 240:3:1                                                     | 12       | 12.1                   |
| 5   | 240:3:1                                                     | 24       | 17.1                   |
| 6   | 240:3:1                                                     | 39       | 19.9                   |
| 9   | 400:5:1                                                     | 24       | 10.6                   |
| 10  | 400:5:1                                                     | 44       | 16.1                   |

**Table S2.** Summary of the effect of CTAs and solvents on the synthesis of PmAzo and PmAzo-*b*-PNIPAM.

| NO. | monomers | [CTA] | Solvents     | Time (h) | Conv. <sup>a</sup> (%) |
|-----|----------|-------|--------------|----------|------------------------|
| 1   | mAzo     | DDMAT | acetonitrile | 15       | 28.8                   |
| 2   | mAzo     | DDMAT | acetonitrile | 24       | 46.1                   |
| 3   | mAzo     | DDMAT | 1,4-dioxane  | 15       | 18.3                   |
| 4   | mAzo     | DDMAT | 1,4-dioxane  | 24       | 27.1                   |
| 5   | mAzo     | CDTPA | acetonitrile | 15       | 25.7                   |
| 6   | mAzo     | CDTPA | acetonitrile | 24       | 45.2                   |
| 7   | mAzo     | CDTPA | 1,4-dioxane  | 15       | 17.7                   |
| 8   | mAzo     | CDTPA | 1,4-dioxane  | 24       | 26.0                   |

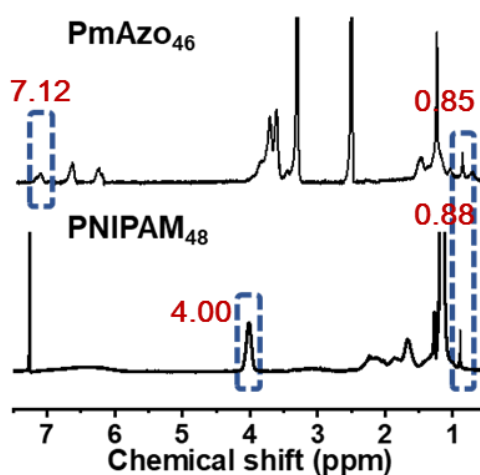

**Figure S2.** <sup>1</sup>H NMR spectra (400 MHz, DMSO-d<sub>6</sub>) of the PmAzo<sub>46</sub> and PNIPAM<sub>48</sub> macro-CTAs.

### 3. Thermo-response of the PmAzo-*b*-PNIPAM micelles

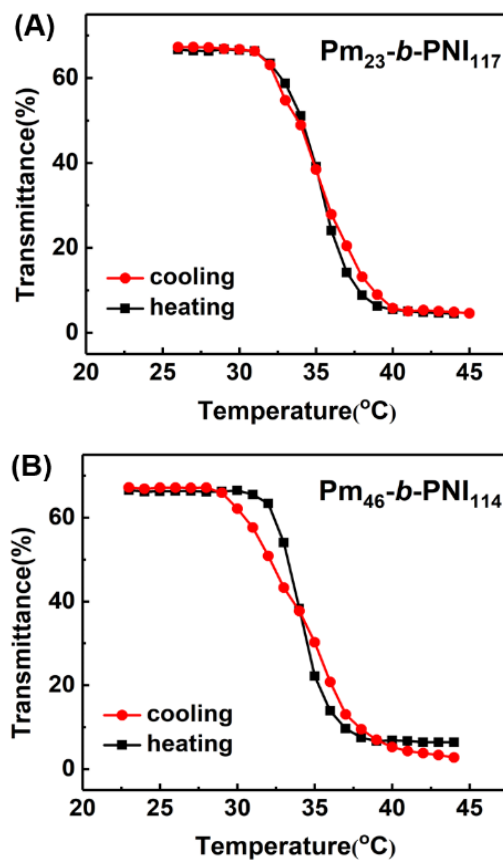

**Figure S3.** Temperature dependent transmittance of 0.1 mg mL<sup>-1</sup> PmAzo<sub>23</sub>-*b*-PNIPAM<sub>117</sub> and PmAzo<sub>46</sub>-*b*-PNIPAM<sub>114</sub> micelles at 700 nm upon repeated cycles of heating/cooling.

### 4. DLS analysis

**Table S3.** Summary of DLS analysis of the PmAzo-*b*-PNIPAM micelles in water at 25 °C.

| sample                                          | $D_h$ (nm) | polydispersity | conc.(mg mL <sup>-1</sup> ) |
|-------------------------------------------------|------------|----------------|-----------------------------|
| Pm <sub>8</sub> - <i>b</i> -PNI <sub>112</sub>  | 225 ±4     | 0.178          | 0.1                         |
| Pm <sub>23</sub> - <i>b</i> -PNI <sub>117</sub> | 258 ±5     | 0.238          | 0.1                         |
| Pm <sub>46</sub> - <i>b</i> -PNI <sub>114</sub> | 278 ±5     | 0.264          | 0.1                         |
| Pm <sub>74</sub> - <i>b</i> -PNI <sub>110</sub> | 317 ±10    | 0.289          | 0.1                         |
| Pm <sub>46</sub> - <i>b</i> -PNI <sub>90</sub>  | 301 ±6     | 0.235          | 0.1                         |
| Pm <sub>46</sub> - <i>b</i> -PNI <sub>50</sub>  | 319 ±7     | 0.298          | 0.1                         |

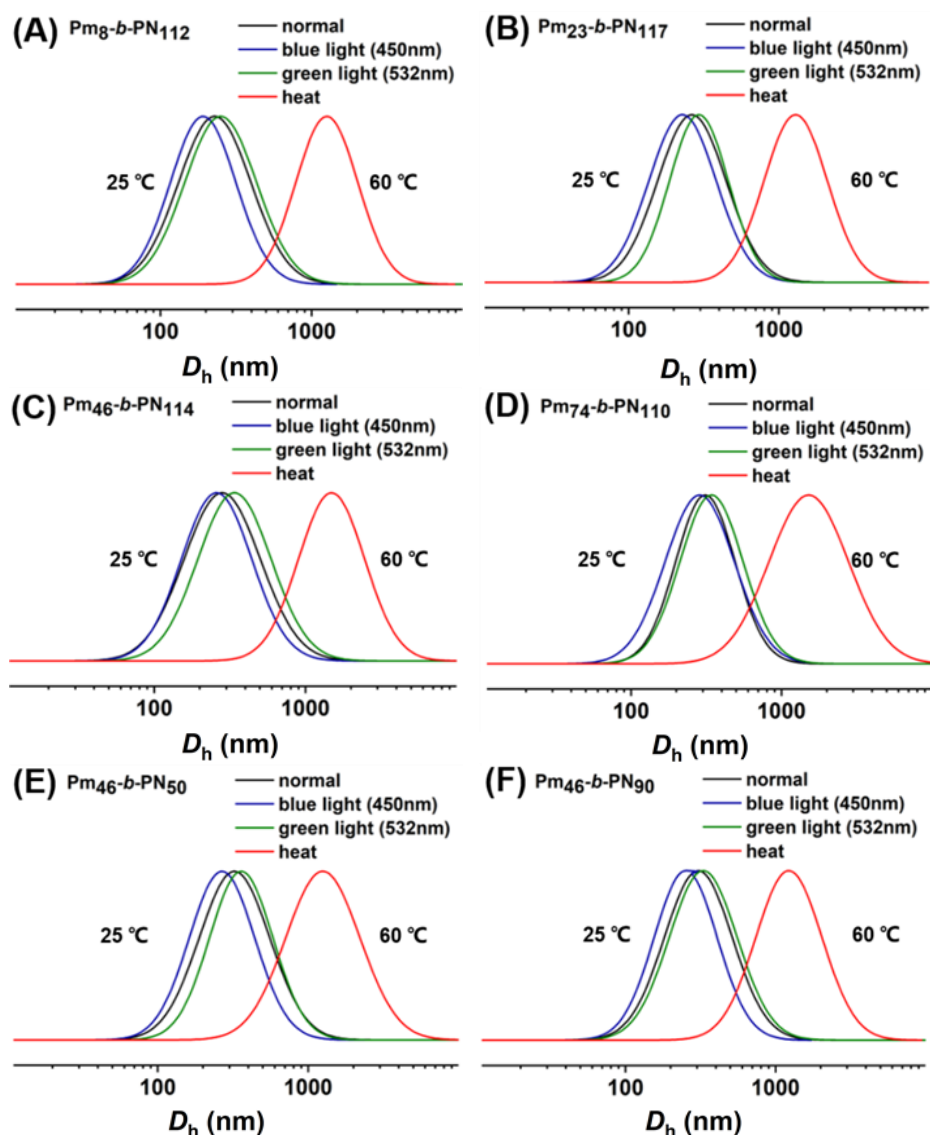

**Figure S4.** DLS analysis of 0.1 mg mL<sup>-1</sup> block copolymer micelles:  $Pm_8-b-PNI_{112}$  (A),  $Pm_{23}-b-PNI_{117}$  (B),  $Pm_{46}-b-PNI_{114}$  (C),  $Pm_{74}-b-PNI_{110}$  (D),  $Pm_{46}-b-PNI_{50}$  (E) and  $Pm_{46}-b-PNI_{90}$  (F) with a given light irradiation at a temperature of 25 °C and 60 °C.

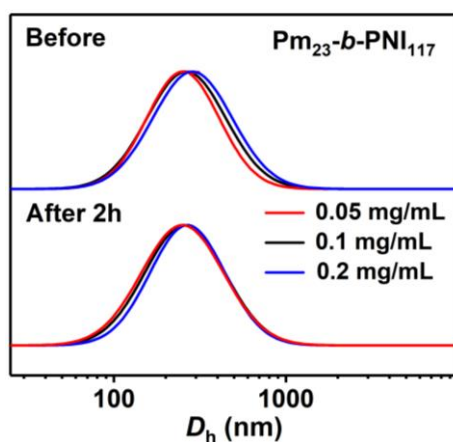

**Figure S5.** DLS analysis of the  $Pm_{23}-b-PNI_{117}$  micelles before and after diluting with water after 2 h at 25 °C.

## 5. UV-vis analysis

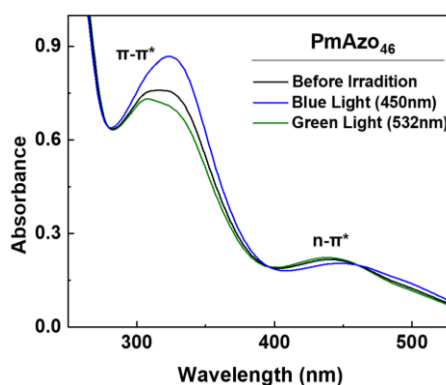

**Figure S6.** UV-Vis spectra of PmAzo<sub>46</sub> in DMF (0.1 mg mL<sup>-1</sup>) under the irradiation of 532 nm green light and 450 nm blue light.

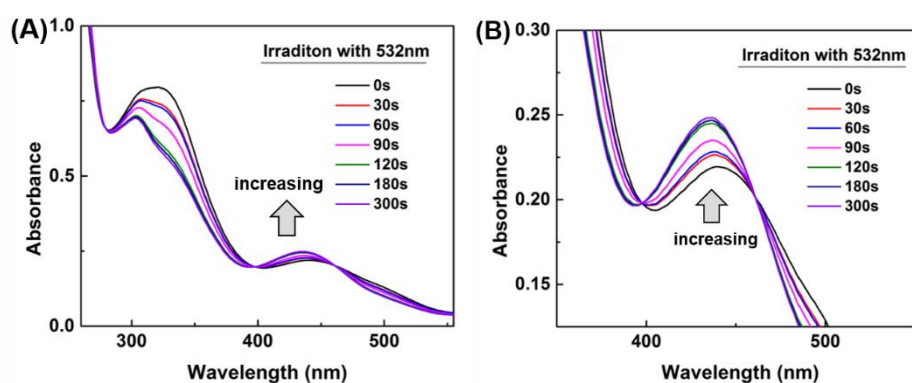

**Figure S7.** UV-Vis spectra of 0.1 mg mL<sup>-1</sup> Pm<sub>23</sub>-b-PNI<sub>117</sub> micelles under the irradiation of 532 nm green light.

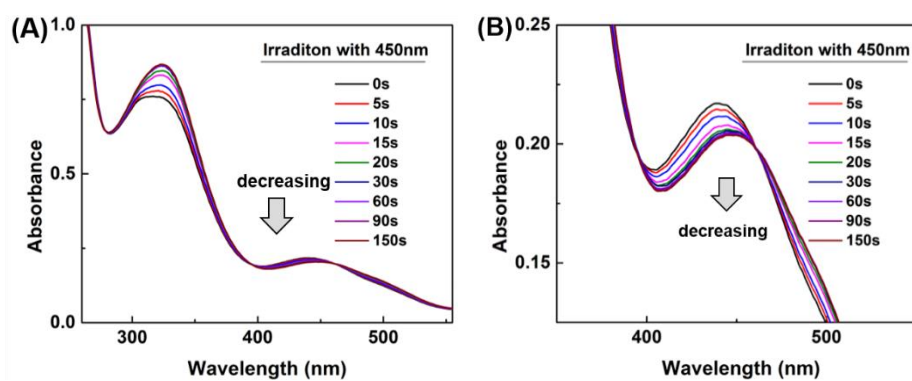

**Figure S8.** UV-Vis spectra of 0.1 mg mL<sup>-1</sup> Pm<sub>23</sub>-b-PNI<sub>117</sub> micelles under the irradiation of 450 nm blue light.

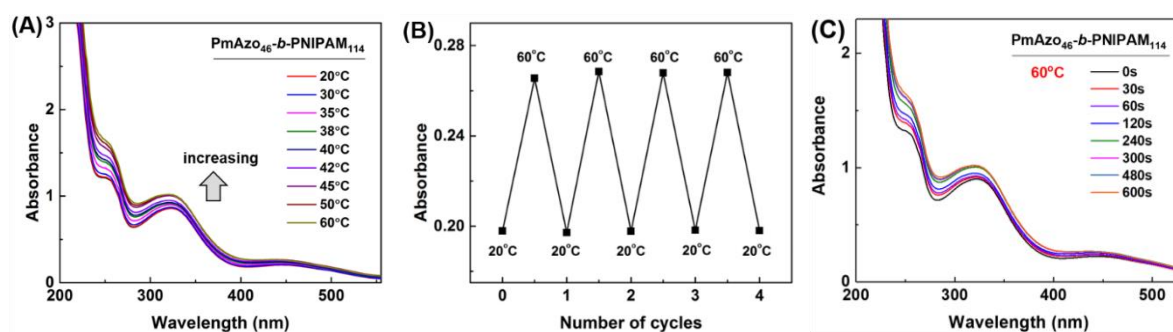

**Figure S9.** (A) UV-Vis spectrum of the  $0.1 \text{ mg mL}^{-1}$   $\text{PmAzo}_{46}\text{-}b\text{-PNI}_{114}$  micelles gradually heating to  $60^\circ \text{C}$  (B) The reversible absorbance changes at  $438 \text{ nm}$  heating to  $60^\circ \text{C}$  and cooling down to  $25^\circ \text{C}$ . Note: in each temperature, the sample was initially kept for 5 min and then the absorbance is recorded. (C) UV-Vis spectra of the  $0.1 \text{ mg mL}^{-1}$   $\text{PmAzo}_{46}\text{-}b\text{-PNI}_{114}$  aqueous dispersion in  $60^\circ \text{C}$  under the irradiation of  $450 \text{ nm}$  blue light.

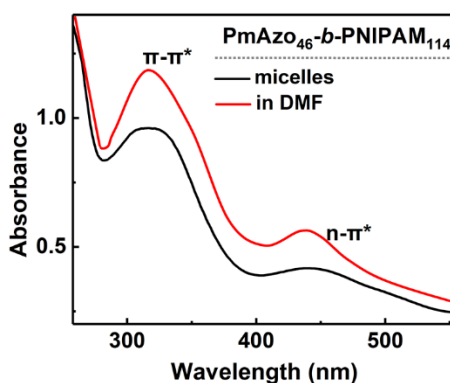

**Figure S10.** UV-Vis spectra of  $0.1 \text{ mg mL}^{-1}$   $\text{PmAzo}_{46}\text{-}b\text{-PNI}_{114}$  block copolymer micelles dispersed in water and the DMF solution with the same polymer concentration.
